# Supplementary material for: New prognostic factors and scoring system for patients with acute myeloid leukemia
Source: PubMed Central journal article supplement — Oncol Lett. 2021 Oct 11;22(6):823. doi: 10.3892/ol.2021.13084 (PMC8527825; doi:10.3892/ol.2021.13084), 2021-10-11
Supplement: Supplementary_Data.pdf [file Supplementary_Data.pdf]

Table SI. Differentially expressed mRNA transcripts.

| Gene ID   | log <sub>2</sub> (fold change) | P-value                 | Change |
|-----------|--------------------------------|-------------------------|--------|
| CORT      | 4.356201353                    | 1.13x10 <sup>-189</sup> | Up     |
| ANGPTL7   | 4.553492283                    | 5.37x10 <sup>-165</sup> | Up     |
| GPR3      | 4.125241447                    | 5.04x10 <sup>-145</sup> | Up     |
| DCDC2B    | 4.830720184                    | 9.03x10 <sup>-188</sup> | Up     |
| HEYL      | 4.026968712                    | 1.99x10 <sup>-129</sup> | Up     |
| HPDL      | 4.585158731                    | 1.27x10 <sup>-160</sup> | Up     |
| TEX38     | 4.468373846                    | 7.47x10 <sup>-254</sup> | Up     |
| NDC1      | 4.383602595                    | 6.95x10 <sup>-171</sup> | Up     |
| RPAP2     | 4.660416573                    | 8.75x10 <sup>-193</sup> | Up     |
| SASS6     | 4.401057382                    | 1.57x10 <sup>-150</sup> | Up     |
| RXFP4     | 6.44756544                     | 2.70x10 <sup>-262</sup> | Up     |
| MEX3A     | 5.508877138                    | 8.22x10 <sup>-155</sup> | Up     |
| PIGM      | 4.078128986                    | 5.28x10 <sup>-164</sup> | Up     |
| GPR52     | 4.265442998                    | 6.10x10 <sup>-164</sup> | Up     |
| OCLM      | 5.954941024                    | 2.92x10 <sup>-237</sup> | Up     |
| PDC       | 4.683001583                    | 2.46x10 <sup>-275</sup> | Up     |
| B3GALT2   | 4.371177353                    | 5.64x10 <sup>-145</sup> | Up     |
| ZBTB41    | 4.367275601                    | 1.72x10 <sup>-126</sup> | Up     |
| ZBED6     | 5.704675214                    | 4.61x10 <sup>-172</sup> | Up     |
| SLC45A3   | 5.604215318                    | 3.62x10 <sup>-172</sup> | Up     |
| AVPR1B    | 4.381594519                    | 2.56x10 <sup>-156</sup> | Up     |
| MAP10     | 4.755878572                    | 6.83x10 <sup>-129</sup> | Up     |
| CHML      | 5.598556456                    | 7.38x10 <sup>-169</sup> | Up     |
| TFB2M     | 4.029101241                    | 5.25x10 <sup>-147</sup> | Up     |
| ZNF670    | 4.197299093                    | 3.85x10 <sup>-140</sup> | Up     |
| MYCN      | 7.056117374                    | 6.79x10 <sup>-161</sup> | Up     |
| PFN4      | 4.686523558                    | 1.67x10 <sup>-228</sup> | Up     |
| KCNK12    | 4.303299306                    | 7.28x10 <sup>-148</sup> | Up     |
| GPR75     | 5.82508115                     | 2.57x10 <sup>-205</sup> | Up     |
| TSPYL6    | 4.946927465                    | 3.73x10 <sup>-267</sup> | Up     |
| ETAA1     | 4.218368223                    | 3.95x10 <sup>-133</sup> | Up     |
| TUBA3D    | 5.973646097                    | 2.52x10 <sup>-271</sup> | Up     |
| TTC30A    | 4.08376329                     | 2.27x10 <sup>-127</sup> | Up     |
| DYTN      | 4.689842342                    | 3.16x10 <sup>-101</sup> | Up     |
| FAM124B   | 4.32293493                     | 1.13x10 <sup>-126</sup> | Up     |
| HTR2B     | 4.938955422                    | 7.21x10 <sup>-196</sup> | Up     |
| KCNJ13    | 6.169985005                    | 2.13x10 <sup>-240</sup> | Up     |
| CROCC2    | 4.041230898                    | 3.70x10 <sup>-66</sup>  | Up     |
| LHFPL4    | 4.180160323                    | 1.17x10 <sup>-169</sup> | Up     |
| MKRN2OS   | 6.743069001                    | 2.17x10 <sup>-49</sup>  | Up     |
| TRIM71    | 6.583420753                    | 1.14x10 <sup>-132</sup> | Up     |
| EBLN2     | 4.636607323                    | 1.68x10 <sup>-140</sup> | Up     |
| HTR1F     | 5.398029068                    | 1.77x10 <sup>-98</sup>  | Up     |
| MTRNR2L12 | 7.329409664                    | 1.59x10 <sup>-241</sup> | Up     |
| ZBED2     | 5.322982184                    | 2.19x10 <sup>-134</sup> | Up     |
| LRRCS8    | 4.419483211                    | 3.80x10 <sup>-157</sup> | Up     |
| TRH       | 5.402847579                    | 8.01x10 <sup>-75</sup>  | Up     |
| SLC35G2   | 4.567317137                    | 2.66x10 <sup>-157</sup> | Up     |
| CPA3      | 5.998814918                    | 2.11x10 <sup>-97</sup>  | Up     |
| IGSF10    | 7.696473674                    | 2.99x10 <sup>-154</sup> | Up     |
| SUCNR1    | 5.37124582                     | 8.05x10 <sup>-121</sup> | Up     |
| P2RY1     | 4.545471569                    | 1.59x10 <sup>-117</sup> | Up     |
| C3orf80   | 6.870287486                    | 5.48x10 <sup>-145</sup> | Up     |
| FAM184B   | 5.638691854                    | 2.87x10 <sup>-285</sup> | Up     |
| KLB       | 4.951316617                    | 9.29x10 <sup>-214</sup> | Up     |
| GNRHR     | 4.996776334                    | 3.51x10 <sup>-238</sup> | Up     |

Table SI. Continued.

| Gene ID   | log <sub>2</sub> (fold change) | P-value                 | Change |
|-----------|--------------------------------|-------------------------|--------|
| PRSS12    | 4.296453158                    | 1.04x10 <sup>-125</sup> | Up     |
| SPATA5    | 4.104874527                    | 1.57x10 <sup>-131</sup> | Up     |
| MAB21L2   | 4.218598658                    | 2.15x10 <sup>-151</sup> | Up     |
| C4orf46   | 4.111235451                    | 4.08x10 <sup>-156</sup> | Up     |
| NEIL3     | 5.597666741                    | 3.43x10 <sup>-143</sup> | Up     |
| F2RL2     | 4.849957972                    | 4.26x10 <sup>-154</sup> | Up     |
| ZBED3     | 5.296452845                    | 2.03x10 <sup>-186</sup> | Up     |
| MBLAC2    | 5.28042943                     | 7.05x10 <sup>-170</sup> | Up     |
| POU5F2    | 5.443736323                    | 3.89x10 <sup>-196</sup> | Up     |
| TIFAB     | 4.498813302                    | 3.44x10 <sup>-66</sup>  | Up     |
| EGR1      | 6.016321783                    | 1.41x10 <sup>-120</sup> | Up     |
| LRRTM2    | 5.235371246                    | 3.42x10 <sup>-210</sup> | Up     |
| PCDHGB2   | 5.009666599                    | 1.64x10 <sup>-126</sup> | Up     |
| PCDHGA5   | 4.151196015                    | 8.28x10 <sup>-123</sup> | Up     |
| PCDHGB3   | 5.611411757                    | 5.21x10 <sup>-190</sup> | Up     |
| PCDHGA6   | 5.13901274                     | 1.64x10 <sup>-151</sup> | Up     |
| PCDHGA7   | 4.110369447                    | 3.50x10 <sup>-124</sup> | Up     |
| PCDHGA8   | 4.524707643                    | 6.20x10 <sup>-172</sup> | Up     |
| PCDHGC5   | 4.520114565                    | 9.55x10 <sup>-153</sup> | Up     |
| SLC26A2   | 4.632094031                    | 1.09x10 <sup>-153</sup> | Up     |
| IRGM      | 4.598872969                    | 7.68x10 <sup>-134</sup> | Up     |
| FAM196B   | 4.811319735                    | 4.20x10 <sup>-169</sup> | Up     |
| MYLK4     | 4.430116453                    | 6.66x10 <sup>-142</sup> | Up     |
| SOX4      | 6.530332755                    | 4.08x10 <sup>-216</sup> | Up     |
| HIST1H4C  | 4.556646823                    | 9.62x10 <sup>-151</sup> | Up     |
| HIST1H4I  | 4.161984416                    | 7.75x10 <sup>-138</sup> | Up     |
| PGBD1     | 4.198728864                    | 2.09x10 <sup>-153</sup> | Up     |
| ZBTB12    | 4.137256395                    | 2.38x10 <sup>-144</sup> | Up     |
| SCUBE3    | 5.305540384                    | 8.77x10 <sup>-206</sup> | Up     |
| CENPQ     | 4.332826141                    | 9.03x10 <sup>-126</sup> | Up     |
| SRSF12    | 4.59592639                     | 1.29x10 <sup>-180</sup> | Up     |
| PM20D2    | 4.977558568                    | 7.12x10 <sup>-169</sup> | Up     |
| TSTD3     | 4.050396942                    | 2.66x10 <sup>-154</sup> | Up     |
| MFSD4B    | 4.81042638                     | 1.42x10 <sup>-206</sup> | Up     |
| GVQW2     | 4.292667883                    | 1.97x10 <sup>-176</sup> | Up     |
| CLDN20    | 6.100605333                    | 1.16x10 <sup>-262</sup> | Up     |
| GRIFIN    | 4.791546756                    | 3.38x10 <sup>-209</sup> | Up     |
| ANKRD61   | 5.231818709                    | 9.43x10 <sup>-220</sup> | Up     |
| TWISTNB   | 4.52341486                     | 8.81x10 <sup>-169</sup> | Up     |
| HOXA5     | 4.971817506                    | 1.53x10 <sup>-66</sup>  | Up     |
| HOXA6     | 5.625360291                    | 2.10x10 <sup>-96</sup>  | Up     |
| HOXA10    | 4.20438281                     | 1.26x10 <sup>-60</sup>  | Up     |
| SPDYE1    | 4.88697072                     | 9.87x10 <sup>-180</sup> | Up     |
| SPDYE3    | 4.403748473                    | 3.47x10 <sup>-183</sup> | Up     |
| GPR22     | 4.646747288                    | 4.23x10 <sup>-188</sup> | Up     |
| OPN1SW    | 4.980246128                    | 2.78x10 <sup>-278</sup> | Up     |
| ZC3HAV1L  | 7.538725605                    | 1.73x10 <sup>-286</sup> | Up     |
| TAS2R3    | 4.601855263                    | 2.27x10 <sup>-194</sup> | Up     |
| TAS2R4    | 4.658148663                    | 2.50x10 <sup>-150</sup> | Up     |
| TAS2R5    | 4.608799077                    | 3.95x10 <sup>-158</sup> | Up     |
| MTRNR2L6  | 5.206884097                    | 9.26x10 <sup>-295</sup> | Up     |
| XRCC2     | 6.74294625                     | 5.85x10 <sup>-201</sup> | Up     |
| YY2       | 4.257310477                    | 5.95x10 <sup>-159</sup> | Up     |
| MTRNR2L10 | 4.646437372                    | 1.10x10 <sup>-277</sup> | Up     |
| USP51     | 4.836716093                    | 3.49x10 <sup>-167</sup> | Up     |
| SPIN4     | 6.142746848                    | 3.75x10 <sup>-164</sup> | Up     |

Table SI. Continued.

| Gene ID  | log <sub>2</sub> (fold change) | P-value                 | Change |
|----------|--------------------------------|-------------------------|--------|
| ZC3H12B  | 4.438301554                    | 1.33x10 <sup>-163</sup> | Up     |
| P2RY4    | 4.23780234                     | 1.26x10 <sup>-215</sup> | Up     |
| KIF4A    | 4.393624038                    | 2.98x10 <sup>-97</sup>  | Up     |
| ERCC6L   | 5.42222593                     | 7.85x10 <sup>-183</sup> | Up     |
| GPR174   | 4.3074064                      | 3.05x10 <sup>-79</sup>  | Up     |
| RPA4     | 4.785595003                    | 3.52x10 <sup>-185</sup> | Up     |
| RAB40A   | 4.117608518                    | 9.29x10 <sup>-162</sup> | Up     |
| RAB9B    | 4.492809319                    | 9.08x10 <sup>-145</sup> | Up     |
| TRPC5    | 4.536876078                    | 4.01x10 <sup>-232</sup> | Up     |
| PRSS51   | 4.507780008                    | 8.81x10 <sup>-192</sup> | Up     |
| CYP7B1   | 4.381185161                    | 2.42x10 <sup>-87</sup>  | Up     |
| SLC10A5  | 4.528255807                    | 2.48x10 <sup>-183</sup> | Up     |
| C8orf37  | 4.62796388                     | 1.20x10 <sup>-162</sup> | Up     |
| DSCC1    | 5.846022882                    | 4.18x10 <sup>-174</sup> | Up     |
| KCNV2    | 4.55875794                     | 1.10x10 <sup>-251</sup> | Up     |
| INSL6    | 5.656833338                    | 2.88x10 <sup>-283</sup> | Up     |
| ACER2    | 4.368084847                    | 1.88x10 <sup>-155</sup> | Up     |
| LRRC19   | 6.126585974                    | 2.03x10 <sup>-299</sup> | Up     |
| MAMDC2   | 6.629860308                    | 2.13x10 <sup>-151</sup> | Up     |
| OMD      | 5.561939204                    | 6.08x10 <sup>-160</sup> | Up     |
| ZNF367   | 5.092266375                    | 4.34x10 <sup>-165</sup> | Up     |
| BSPRY    | 4.184816666                    | 1.84x10 <sup>-100</sup> | Up     |
| STKLD1   | 4.838641407                    | 1.80x10 <sup>-206</sup> | Up     |
| DRD4     | 4.44143451                     | 2.17x10 <sup>-164</sup> | Up     |
| OR52H1   | 4.009471627                    | 2.07x10 <sup>-218</sup> | Up     |
| MTRNR2L8 | 4.788395043                    | 7.41x10 <sup>-128</sup> | Up     |
| KIF18A   | 5.105629537                    | 1.13x10 <sup>-139</sup> | Up     |
| ALX4     | 4.477277623                    | 1.72x10 <sup>-236</sup> | Up     |
| FAM180B  | 5.435348271                    | 1.86x10 <sup>-198</sup> | Up     |
| C1QTNF4  | 6.116073096                    | 1.68x10 <sup>-145</sup> | Up     |
| C11orf95 | 4.363481119                    | 9.79x10 <sup>-165</sup> | Up     |
| RCOR2    | 4.480967328                    | 7.74x10 <sup>-171</sup> | Up     |
| FLRT1    | 4.468966889                    | 1.26x10 <sup>-152</sup> | Up     |
| ARHGEF17 | 4.475330357                    | 1.28x10 <sup>-153</sup> | Up     |
| AQP11    | 5.316487234                    | 1.91x10 <sup>-197</sup> | Up     |
| PLET1    | 4.388820398                    | 9.07x10 <sup>-278</sup> | Up     |
| C1QL3    | 4.990776556                    | 5.56x10 <sup>-170</sup> | Up     |
| CASC10   | 6.342262071                    | 3.28x10 <sup>-149</sup> | Up     |
| TET1     | 5.52580944                     | 1.19x10 <sup>-153</sup> | Up     |
| PALD1    | 4.528183919                    | 1.85x10 <sup>-129</sup> | Up     |
| KIF11    | 4.983432465                    | 1.15x10 <sup>-141</sup> | Up     |
| PDE6C    | 4.994487568                    | 2.16x10 <sup>-219</sup> | Up     |
| LOXL4    | 4.194431615                    | 2.30x10 <sup>-129</sup> | Up     |
| WNT8B    | 4.138772367                    | 6.10x10 <sup>-184</sup> | Up     |
| NHLRC2   | 4.052671018                    | 2.14x10 <sup>-150</sup> | Up     |
| TRUB1    | 4.115788945                    | 4.20x10 <sup>-122</sup> | Up     |
| TAS2R10  | 4.945450023                    | 6.22x10 <sup>-257</sup> | Up     |
| TAS2R13  | 5.506147915                    | 3.12x10 <sup>-278</sup> | Up     |
| TAS2R14  | 4.540869186                    | 1.04x10 <sup>-143</sup> | Up     |
| TAS2R50  | 4.582156294                    | 1.25x10 <sup>-255</sup> | Up     |
| TAS2R20  | 4.013747438                    | 4.88x10 <sup>-135</sup> | Up     |
| TAS2R19  | 5.139292144                    | 1.69x10 <sup>-227</sup> | Up     |
| TAS2R31  | 5.236762298                    | 5.74x10 <sup>-230</sup> | Up     |
| TAS2R46  | 4.917763984                    | 4.79x10 <sup>-242</sup> | Up     |
| TAS2R43  | 4.894661906                    | 6.56x10 <sup>-195</sup> | Up     |
| TAS2R30  | 5.452021799                    | 4.06x10 <sup>-222</sup> | Up     |

Table SI. Continued.

| Gene ID   | log <sub>2</sub> (fold change) | P-value                 | Change |
|-----------|--------------------------------|-------------------------|--------|
| C12orf71  | 4.2563745                      | 1.31x10 <sup>-200</sup> | Up     |
| ZBTB39    | 4.025718498                    | 9.03x10 <sup>-143</sup> | Up     |
| UTP20     | 4.685480902                    | 1.27x10 <sup>-170</sup> | Up     |
| ZNF891    | 4.913732443                    | 5.12x10 <sup>-180</sup> | Up     |
| PABPC3    | 4.728310738                    | 5.88x10 <sup>-190</sup> | Up     |
| URAD      | 4.472672356                    | 2.38x10 <sup>-151</sup> | Up     |
| AKAP11    | 4.199865421                    | 5.81x10 <sup>-145</sup> | Up     |
| KCTD4     | 5.084363396                    | 9.03x10 <sup>-244</sup> | Up     |
| GPR180    | 4.352111376                    | 4.04x10 <sup>-149</sup> | Up     |
| CCDC168   | 4.602678888                    | 2.90x10 <sup>-189</sup> | Up     |
| CHAMP1    | 4.10122692                     | 2.37x10 <sup>-164</sup> | Up     |
| ZFHX2     | 5.033717068                    | 2.41x10 <sup>-182</sup> | Up     |
| NYNRIN    | 6.234663631                    | 1.00x10 <sup>-185</sup> | Up     |
| GPR135    | 5.980423322                    | 2.50x10 <sup>-221</sup> | Up     |
| SLC10A1   | 4.487805513                    | 2.82x10 <sup>-116</sup> | Up     |
| ZC2HC1C   | 4.222859893                    | 6.38x10 <sup>-174</sup> | Up     |
| GOLGA8H   | 4.9929913                      | 6.04x10 <sup>-153</sup> | Up     |
| ANKRD63   | 4.671721314                    | 3.42x10 <sup>-229</sup> | Up     |
| DISP2     | 4.703825566                    | 6.18x10 <sup>-185</sup> | Up     |
| MNS1      | 6.333220167                    | 6.89x10 <sup>-249</sup> | Up     |
| FBXL22    | 4.077480807                    | 4.05x10 <sup>-171</sup> | Up     |
| MEX3B     | 6.737950298                    | 3.65x10 <sup>-199</sup> | Up     |
| NPW       | 5.769680121                    | 4.72x10 <sup>-167</sup> | Up     |
| MTRNR2L4  | 4.092797999                    | 6.43x10 <sup>-228</sup> | Up     |
| C16orf96  | 4.288142469                    | 5.54x10 <sup>-150</sup> | Up     |
| MPV17L    | 4.056774688                    | 1.13x10 <sup>-90</sup>  | Up     |
| ZNF629    | 4.262861889                    | 6.47x10 <sup>-185</sup> | Up     |
| AGRP      | 4.236742623                    | 1.64x10 <sup>-197</sup> | Up     |
| GAN       | 4.38016808                     | 2.53x10 <sup>-177</sup> | Up     |
| GSG2      | 4.277180791                    | 2.41x10 <sup>-123</sup> | Up     |
| ZNF594    | 4.808549389                    | 1.71x10 <sup>-149</sup> | Up     |
| SLC35G6   | 4.847823986                    | 4.76x10 <sup>-246</sup> | Up     |
| MTRNR2L1  | 7.452538188                    | 1.64x10 <sup>-227</sup> | Up     |
| KLHL11    | 5.583354609                    | 4.94x10 <sup>-193</sup> | Up     |
| HOXB5     | 4.405970084                    | 5.21x10 <sup>-68</sup>  | Up     |
| HOXB6     | 4.22343999                     | 9.85x10 <sup>-59</sup>  | Up     |
| NOG       | 4.208700369                    | 6.97x10 <sup>-79</sup>  | Up     |
| MPO       | 5.907926976                    | 8.10x10 <sup>-76</sup>  | Up     |
| NACA2     | 4.097907675                    | 9.37x10 <sup>-195</sup> | Up     |
| SMIM6     | 4.094975834                    | 1.54x10 <sup>-160</sup> | Up     |
| ZNF750    | 4.510651245                    | 6.37x10 <sup>-175</sup> | Up     |
| SOCS6     | 4.293432071                    | 2.54x10 <sup>-145</sup> | Up     |
| SOX12     | 4.448583072                    | 9.98x10 <sup>-172</sup> | Up     |
| CPXM1     | 7.907726403                    | 1.57x10 <sup>-183</sup> | Up     |
| C20orf194 | 4.346852147                    | 7.52x10 <sup>-173</sup> | Up     |
| GINS1     | 5.344677298                    | 6.80x10 <sup>-163</sup> | Up     |
| MMP24     | 4.311282723                    | 6.60x10 <sup>-189</sup> | Up     |
| NNAT      | 4.060900245                    | 4.37x10 <sup>-160</sup> | Up     |
| SPATA25   | 4.341778638                    | 4.43x10 <sup>-184</sup> | Up     |
| ARFGEF2   | 4.194054897                    | 3.83x10 <sup>-157</sup> | Up     |
| MTRNR2L3  | 5.296406158                    | 2.78x10 <sup>-291</sup> | Up     |
| ZNF878    | 4.313280743                    | 1.90x10 <sup>-165</sup> | Up     |
| SYCE2     | 4.275534448                    | 1.35x10 <sup>-167</sup> | Up     |
| TMEM221   | 4.008742858                    | 9.42x10 <sup>-148</sup> | Up     |
| ZNF253    | 4.214692337                    | 1.83x10 <sup>-143</sup> | Up     |
| ZNF492    | 4.805202152                    | 3.49x10 <sup>-173</sup> | Up     |

Table SI. Continued.

| Gene ID    | $\log_2(\text{fold change})$ | P-value                 | Change |
|------------|------------------------------|-------------------------|--------|
| ZNF681     | 4.736832302                  | $5.69 \times 10^{-141}$ | Up     |
| KCNJ14     | 4.490213807                  | $1.77 \times 10^{-159}$ | Up     |
| FUT2       | 4.700837967                  | $3.30 \times 10^{-167}$ | Up     |
| ACPT       | 6.489324863                  | $2.46 \times 10^{-108}$ | Up     |
| ZNF888     | 6.001647845                  | $3.46 \times 10^{-308}$ | Up     |
| ZNF805     | 4.158591868                  | $2.18 \times 10^{-170}$ | Up     |
| ZNF543     | 4.239418194                  | $2.14 \times 10^{-151}$ | Up     |
| VN1R1      | 4.86352742                   | $2.29 \times 10^{-177}$ | Up     |
| ZNF132     | 4.200107218                  | $1.37 \times 10^{-146}$ | Up     |
| CCDC188    | 5.093753513                  | $7.59 \times 10^{-191}$ | Up     |
| IGLL1      | 6.678343816                  | $2.76 \times 10^{-114}$ | Up     |
| ZNF70      | 6.036182973                  | $7.31 \times 10^{-221}$ | Up     |
| MN1        | 5.024633032                  | $1.16 \times 10^{-110}$ | Up     |
| SLC5A4     | 4.435928379                  | $3.52 \times 10^{-136}$ | Up     |
| DNAJB7     | 4.171732382                  | $1.40 \times 10^{-170}$ | Up     |
| ATP5L2     | 4.021906691                  | $8.94 \times 10^{-276}$ | Up     |
| RIBC2      | 4.320712393                  | $8.46 \times 10^{-121}$ | Up     |
| PKDREJ     | 4.915597511                  | $5.51 \times 10^{-165}$ | Up     |
| ZBED4      | 4.272197185                  | $5.53 \times 10^{-176}$ | Up     |
| URB1       | 4.088291593                  | $3.67 \times 10^{-159}$ | Up     |
| SLC5A3     | 4.437550508                  | $2.80 \times 10^{-122}$ | Up     |
| CDA        | -4.403794691                 | $8.35 \times 10^{-97}$  | Down   |
| HIST2H4A   | -4.679754854                 | $5.26 \times 10^{-172}$ | Down   |
| HIST2H2AA3 | -10.26341605                 | $1.68 \times 10^{-250}$ | Down   |
| HIST2H2AA4 | -9.460554942                 | $3.30 \times 10^{-259}$ | Down   |
| HIST2H4B   | -5.522448966                 | $1.55 \times 10^{-157}$ | Down   |
| S100A9     | -5.524523211                 | $2.76 \times 10^{-94}$  | Down   |
| S100A12    | -5.908172865                 | $1.87 \times 10^{-90}$  | Down   |
| HSPA6      | -7.683894895                 | $1.39 \times 10^{-201}$ | Down   |
| G0S2       | -4.76273513                  | $2.19 \times 10^{-55}$  | Down   |
| TNFAIP6    | -4.121611529                 | $8.18 \times 10^{-82}$  | Down   |
| CXCR1      | -9.673424618                 | $3.70 \times 10^{-240}$ | Down   |
| CAMP       | -5.537066888                 | $1.09 \times 10^{-104}$ | Down   |
| S100P      | -5.427589601                 | $2.02 \times 10^{-129}$ | Down   |
| BASP1      | -4.778419147                 | $3.35 \times 10^{-117}$ | Down   |
| LY6G6F     | -4.035058641                 | $5.61 \times 10^{-82}$  | Down   |
| HSPA1A     | -5.402732524                 | $2.00 \times 10^{-133}$ | Down   |
| HSPA1B     | -4.598780805                 | $1.24 \times 10^{-62}$  | Down   |
| UPK3BL     | -6.090575844                 | $7.72 \times 10^{-179}$ | Down   |
| DEFA4      | -4.815790266                 | $1.92 \times 10^{-58}$  | Down   |
| ORM1       | -7.044880471                 | $5.62 \times 10^{-172}$ | Down   |
| CXCR5      | -5.024063686                 | $9.13 \times 10^{-144}$ | Down   |
| C10orf105  | -4.535911837                 | $1.30 \times 10^{-86}$  | Down   |
| KRT1       | -5.031084756                 | $3.93 \times 10^{-101}$ | Down   |
| HCAR2      | -5.407777424                 | $3.85 \times 10^{-125}$ | Down   |
| HCAR3      | -6.724500499                 | $2.01 \times 10^{-161}$ | Down   |
| OLFM4      | -6.552618196                 | $3.71 \times 10^{-90}$  | Down   |
| RNASE4     | -4.387466499                 | $1.75 \times 10^{-117}$ | Down   |
| HBQ1       | -4.750896745                 | $3.48 \times 10^{-135}$ | Down   |
| KCNJ2      | -4.556847957                 | $1.87 \times 10^{-58}$  | Down   |
| SRXN1      | -5.473367848                 | $1.23 \times 10^{-169}$ | Down   |
| PI3        | -8.036428444                 | $1.11 \times 10^{-145}$ | Down   |
| SLPI       | -4.841345897                 | $7.02 \times 10^{-83}$  | Down   |
| MMP9       | -8.37763866                  | $1.95 \times 10^{-171}$ | Down   |
| LRG1       | -4.35024417                  | $7.76 \times 10^{-88}$  | Down   |
| IFI30      | -7.983020862                 | $2.05 \times 10^{-218}$ | Down   |

Table SI. Continued.

| Gene ID    | $\log_2(\text{fold change})$ | P-value                 | Change |
|------------|------------------------------|-------------------------|--------|
| FFAR2      | -6.860364842                 | $6.23 \times 10^{-156}$ | Down   |
| AC002398.9 | -5.360075896                 | $3.82 \times 10^{-136}$ | Down   |
| PGLYRP1    | -5.835687407                 | $6.31 \times 10^{-162}$ | Down   |
| FPR2       | -5.088523812                 | $8.70 \times 10^{-106}$ | Down   |

Table SII. Clinical characteristics of the healthy controls.

| Clinical characteristics                       | Value     |
|------------------------------------------------|-----------|
| Age, years                                     |           |
| Median                                         | 38        |
| Mean                                           | 36.95     |
| Range                                          | 21-58     |
| Sex, n                                         |           |
| Female                                         | 6         |
| Male                                           | 14        |
| White blood cell count, $\times 10^9$ cells/l  |           |
| Median                                         | 6.68      |
| Mean                                           | 6.50      |
| Range                                          | 5.23-8.29 |
| Red blood cell count, $\times 10^{12}$ cells/l |           |
| Median                                         | 4.76      |
| Mean                                           | 4.73      |
| Range                                          | 4.12-5.23 |
| Platelet count, $\times 10^9$ platelet/l       |           |
| Median                                         | 213       |
| Mean                                           | 209.85    |
| Range                                          | 132-291   |
